# Supplementary material
Source: PubMed Central journal article supplement (PMC5315642)

# All cause mortality

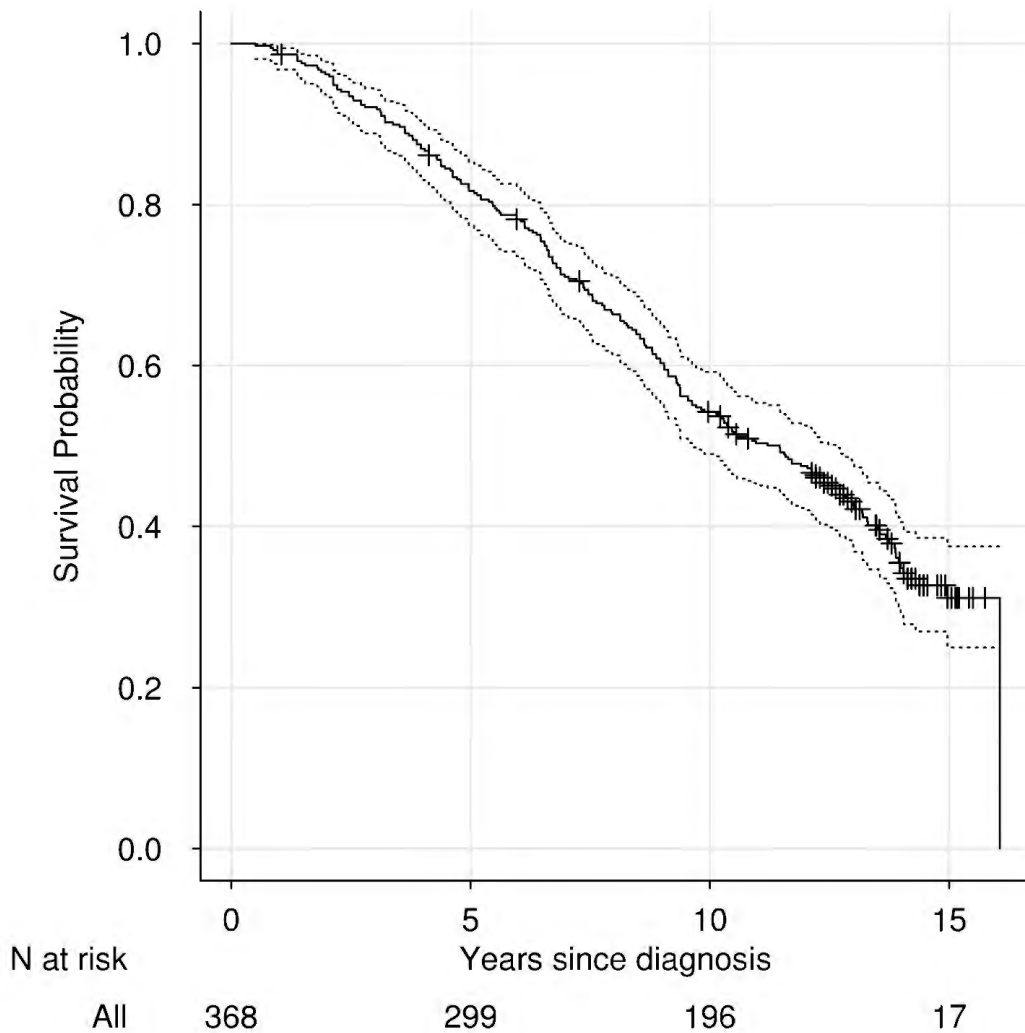

Supplement: NIHMS826098-supplement-1.pdf [file NIHMS826098-supplement-1.pdf]

# Prostate cancer death

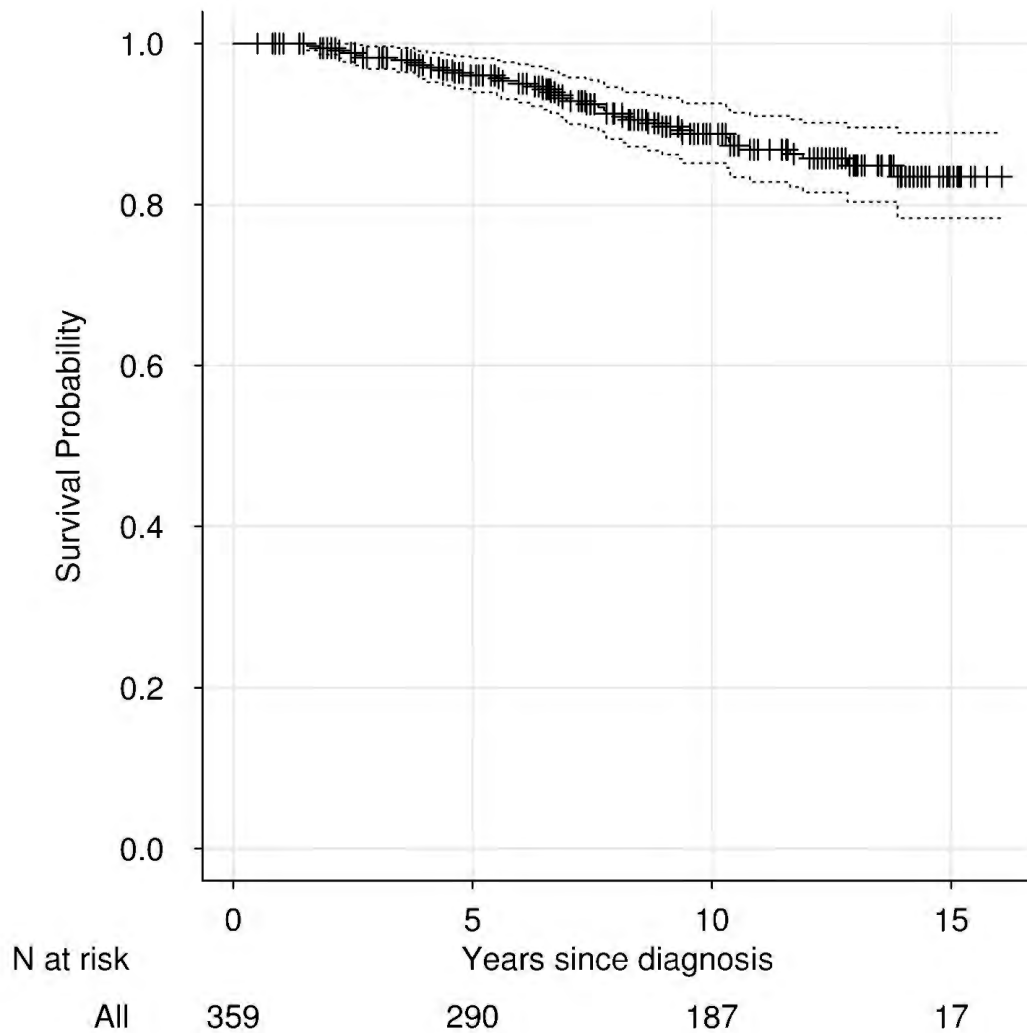

Supplement: NIHMS826098-supplement-2.pdf [file NIHMS826098-supplement-2.pdf]
